# Supplementary material for: Advancements and challenges in the production of low-carbon fuels via catalytic fast pyrolysis of biomass through refinery integration and co-product generation
Source: Royal Society of Chemistry journal article supplement (doi:10.1039/d3gc01574b), 2023-01-01
Supplement: d3gc01574b1.pdf [file d3gc01574b1.pdf]

**Table SI.1.** Ash speciation of the blend of 50 wt% clean pine and 50 wt% forest residues used as a feedstock for the biomass CFP experiments in this report (elements analyzed on ash weight basis then calculated and reported as equivalent oxides). Total ash in the sample, heated to 750 °C was 0.77 wt%.

| Ashed Basis                    | wt%   |
|--------------------------------|-------|
| Al <sub>2</sub> O <sub>3</sub> | 1.77  |
| CaO                            | 13.83 |
| Fe <sub>2</sub> O <sub>3</sub> | 0.78  |
| K <sub>2</sub> O               | 7.62  |
| MgO                            | 5.2   |
| MnO                            | 1.77  |
| Na <sub>2</sub> O              | 0.17  |
| P <sub>2</sub> O <sub>5</sub>  | 1.83  |
| SiO <sub>2</sub>               | 55.48 |
| TiO <sub>2</sub>               | 0.31  |
| SO <sub>3</sub>                | 1.53  |

**Table S1.2.** Product yields from CFP of 50% forest residue and 50% clean pine blend in the 2FBR system showing system reproducibility. The oil produced from CFP Run 3 was used for co-hydrotreating experiments.

| <b>Mass yields</b>   | CFP Run 1 | CFP Run 2 | CFP Run 3 |
|----------------------|-----------|-----------|-----------|
| Organic              | 24%       | 26%       | 24%       |
| Aqueous              | 22%       | 20%       | 25%       |
| Condensables         | 10%       | 11%       | 11%       |
| Permanent gases      | 32%       | 30%       | 27%       |
| Water vapor          | 2%        | 2%        | 2%        |
| Char                 | 11%       | 11%       | 11%       |
| Coke                 | 2%        | 2%        | 2%        |
| Mass balance         | 102%      | 103%      | 102%      |
| <b>Carbon yields</b> |           |           |           |
| Organic              | 34%       | 36%       | 37%       |
| Aqueous              | 2%        | 1%        | 2%        |
| Condensable gases    | 13%       | 13%       | 13%       |
| Light gases          | 31%       | 28%       | 25%       |
| Char                 | 16%       | 18%       | 18%       |
| Coke                 | 3%        | 3%        | 3%        |
| C Balance            | 100%      | 99%       | 97%       |
| O, wt% dry basis     | 17.1%     | 16.9%     | 15.5%     |

**Table SI.3.** Composition of condensable light oxygenate stream from 2FBR experiments during CFP Run 3 from Table SI.2.

| Product               | C yield |
|-----------------------|---------|
| Pentane               | 0.2%    |
| Acetaldehyde          | 3.4%    |
| Furan                 | 0.5%    |
| Acetone               | 4.2%    |
| Cyclopentane, -methyl | 0.2%    |
| Furan, 2-methyl-      | 0.6%    |
| Butanal               | 0.3%    |
| 2-Butanone            | 1.2%    |
| Benzene               | 0.1%    |
| Furan, 2-ethyl-       | 0.2%    |
| Furan, 2-5-dimethyl   | 0.3%    |
| 3-Pentanone           | 0.2%    |
| Toluene               | 0.1%    |
| Cyclopentanone        | 0.2%    |
| 2-Cyclopenten-1-one   | 0.1%    |

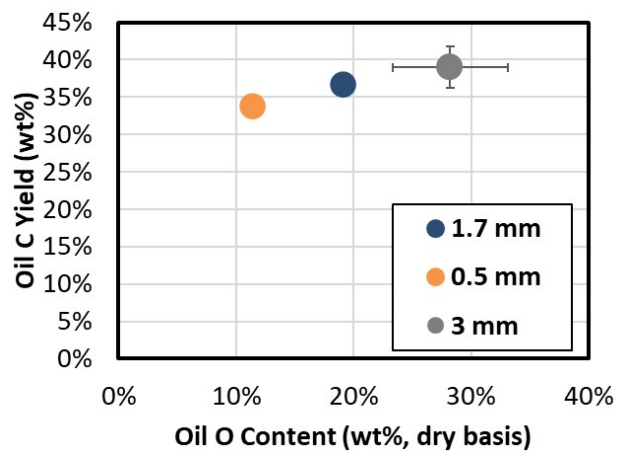

**Figure SI.1.** Impact of support particles size on carbon yield and oxygen content of CFP oil. Smaller support particle size resulted in lower oxygen content. Feedstock clean pine, cumulative B:C 3.

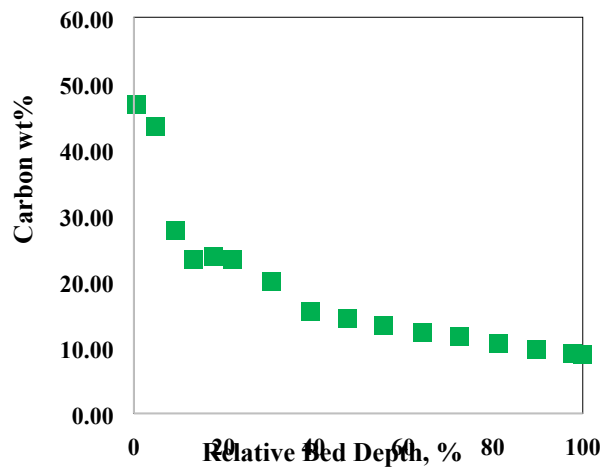

**Figure S1.2.** Coke content on 0.5%Pt/TiO<sub>2</sub> catalyst samples, as determined by combustion analysis, as a function of normalized bed depth throughout the 100 g catalyst during 13 reaction/regeneration cycles of bench-scale biomass CFP utilizing 50:50 wt% blend of clean pine and forest residues to B:C of 12. Samples analyzed for carbon content were not regenerated prior to analysis.

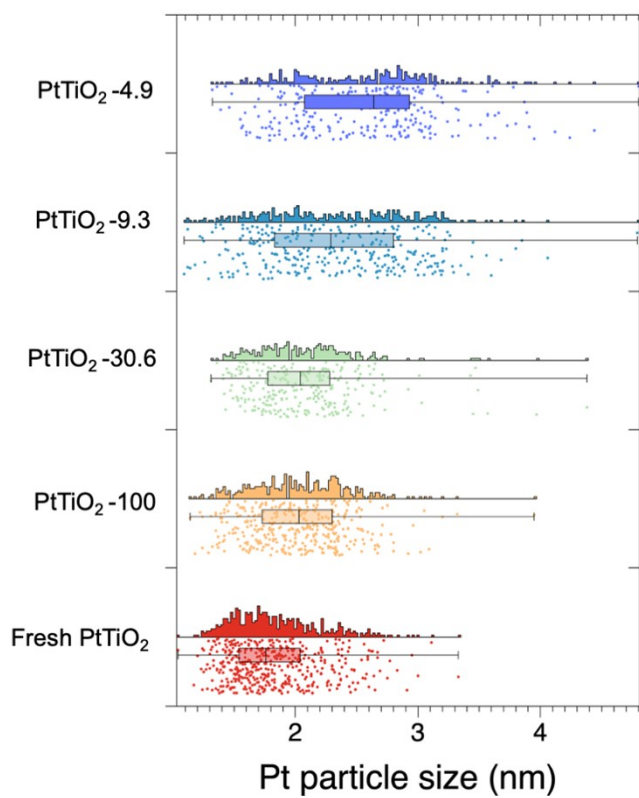

**Figure SI.3.** Pt particle size measurements from scanning transmission electron microscopy (STEM) for catalysts located at different normalized bed depths. For reference, the Pt particle size measurements for fresh Pt/TiO<sub>2</sub> are also included.

Particle size analysis via HAADF-STEM revealed evidence of Pt sintering, with an average Pt particle size of 2.6 nm from post-reaction samples taken at the leading edge of the bed compared to 1.8 nm for fresh Pt/TiO<sub>2</sub>.

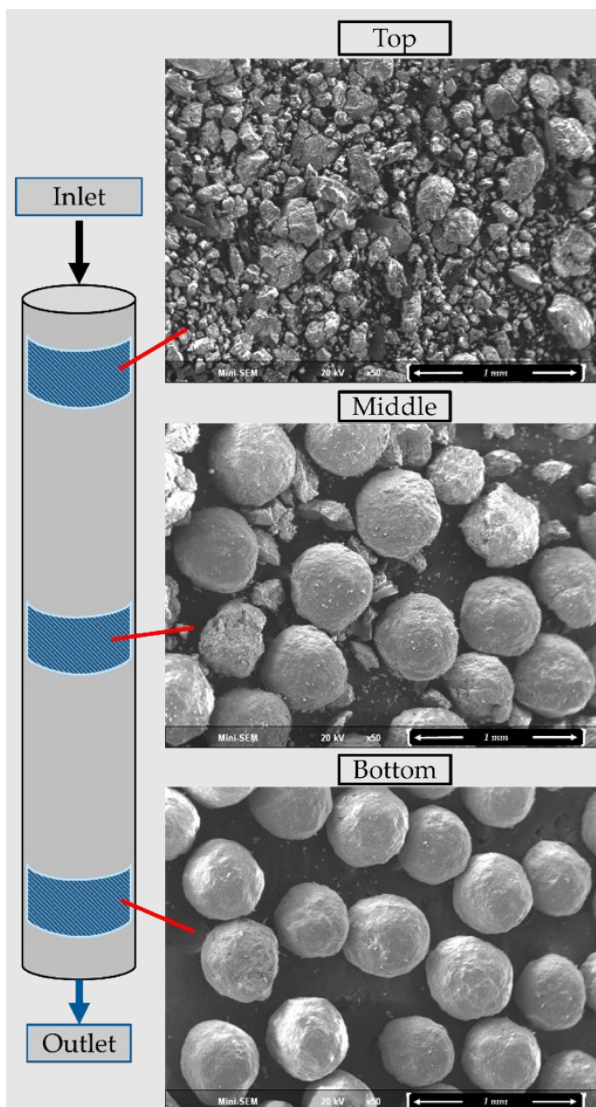

**Figure SI.4.** Schematic showing representative SEM images of 0.5%Pt/TiO<sub>2</sub> post-reaction samples near the reactor inlet (relative depth of 5%), middle (relative depth 40%), and outlet (relative depth 90%) of the bench-scale fixed bed reactor used for upgrading of biomass pyrolysis vapors following 13 reaction/regeneration cycles.

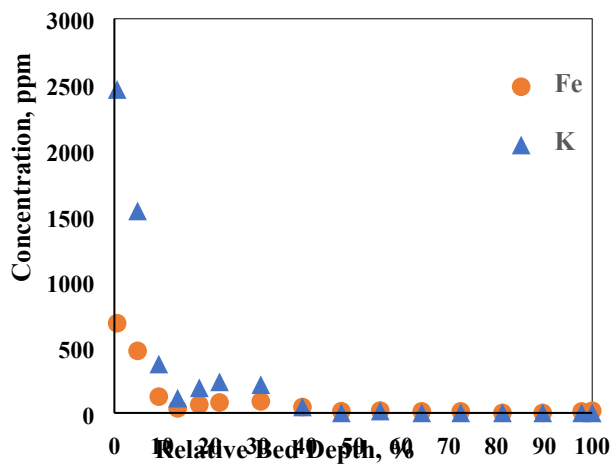

**Figure SI.5.** Concentrations of inorganic contaminants determined by ICP-OES for post-reaction 0.5%Pt/TiO<sub>2</sub> samples. The 100 g catalyst charge was cumulatively exposed to 7.4 kg biomass during 49 h time on stream and 14 reaction cycles. After the last reaction, the catalyst was unloaded prior to regeneration.



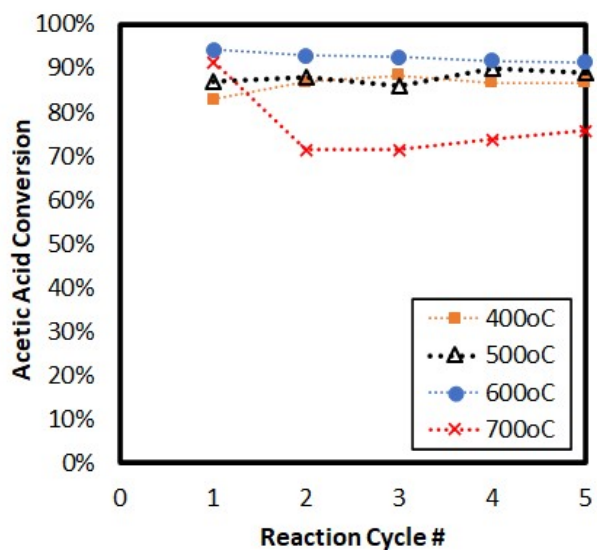

**Figure SI.6.** Acetic acid conversion during micro-scale experiments over the course of five reaction/regeneration cycles at varying oxidative regeneration conditions. The HDO consisted of total of five (5) one-hour reaction cycles at a WHSV  $\sim 20 \text{ h}^{-1}$ , separated by a 2-hour oxidation/reduction regeneration protocol, which resulted in a cumulative reactant-to-catalyst mass ratio of 100. The regeneration consisted of heating from the HDO reaction temperature (400 °C) in inert prior to 1 h of oxidation in 1%  $\text{O}_2$  at temperatures of 400, 500, 600, or 700 °C, followed by a common reduction at 400 °C in 85%  $\text{H}_2$  to activate the catalyst prior to the acetic acid HDO activity measurements.
